# Supplementary material for: Current breeding distributions and predicted range shifts under climate change in two subspecies of Black‐tailed Godwits in Asia
Source: PubMed Central journal article supplement — Glob Chang Biol. 2022 Jul 1;28(18):5416–26. doi: 10.1111/gcb.16308 (PMC9544271; doi:10.1111/gcb.16308), 2022-07-01
Supplement: GCB-28-5416-s001.pdf [file GCB-28-5416-s001.pdf]

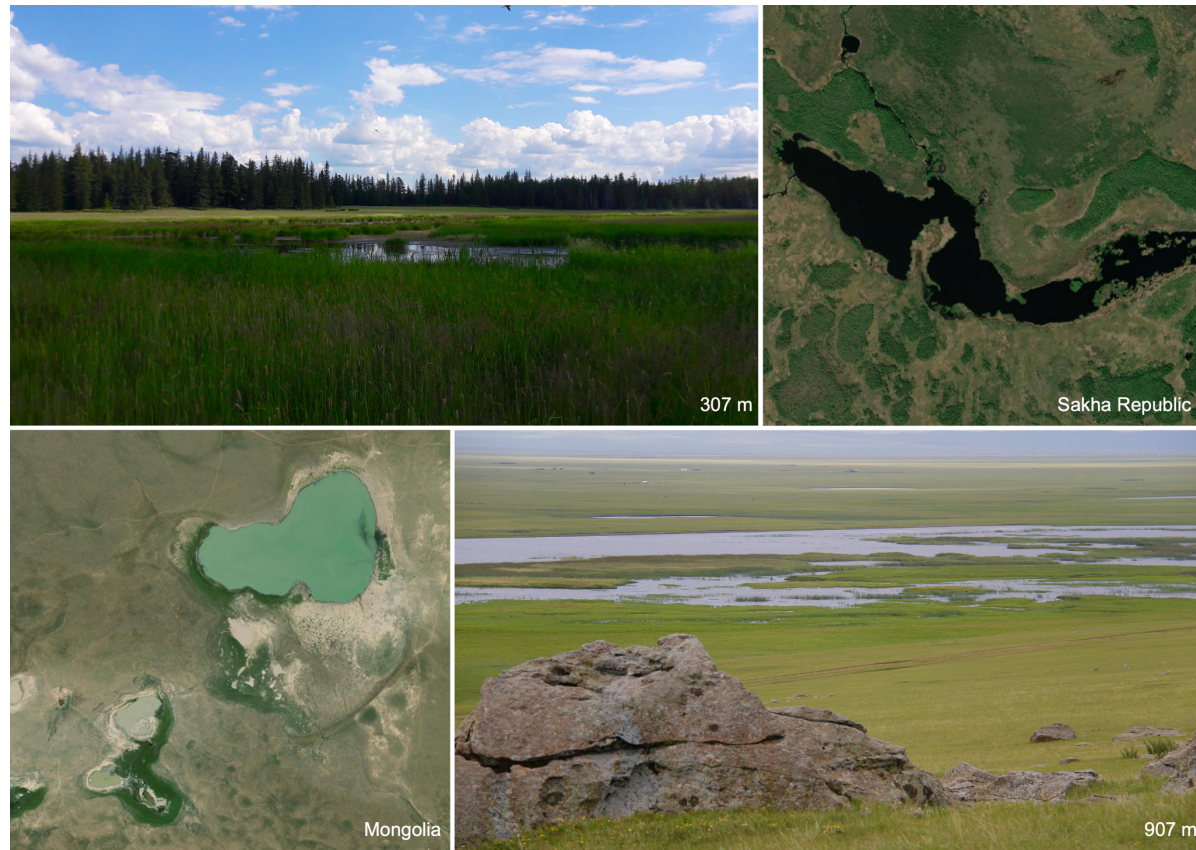

Figure S1. Satellite and field images of the landscape on the breeding habitats of *bohail* at 66°N, 106°E in Russia (at the edge of the Boreal Forest), and *melanuroides* at 45°N, 114°E in Mongolia (on the pasture). The area's average elevation is given in the bottom right (photo by Eugene Shemyakin & Nyambayar Batbayar).
