# Supplementary material for: Current breeding distributions and predicted range shifts under climate change in two subspecies of Black‐tailed Godwits in Asia
Source: PubMed Central journal article supplement — Glob Chang Biol. 2022 Jul 1;28(18):5416–26. doi: 10.1111/gcb.16308 (PMC9544271; doi:10.1111/gcb.16308), 2022-07-01
Supplement: GCB-28-5416-s002.pdf [file GCB-28-5416-s002.pdf]

Table S2. Analysis of variable contributions for the current breeding habitats for *bohaili* and *melanuroides*. (bio2: mean diurnal range, bio4: temperature seasonality, bio8: mean temperature of wettest quarter, bio9: mean temperature of driest quarter, bio11: mean temperature of coldest quarter, bio12: annual precipitation, bio15: precipitation seasonality, bio17: precipitation of driest quarter, hfp: human footprint).

| <i>bohaili</i> | Per cent contribution | Permutation importance | <i>melanuroides</i> | Percent contribution | Permutation importance |
|----------------|-----------------------|------------------------|---------------------|----------------------|------------------------|
| bio4           | 74.8                  | 74.4                   | bio1                | 41.3                 | 69.1                   |
| bio15          | 6.8                   | 7.9                    | bio15               | 11                   | 1.7                    |
| bio1           | 6.2                   | 2                      | hfp                 | 11                   | 4.6                    |
| bio11          | 3.9                   | 3.1                    | elevation           | 7.1                  | 7.6                    |
| bio12          | 3.1                   | 6.3                    | bio11               | 6.5                  | 0.6                    |
| bio17          | 2.1                   | 2.1                    | herbaceous          | 6.3                  | 3.9                    |
| bio8           | 0.6                   | 1.7                    | bio9                | 5.7                  | 3.1                    |
| bio2           | 0.6                   | 0.1                    | shrubs              | 3.6                  | 6.8                    |
| elevation      | 0.5                   | 0.6                    | bio4                | 2.9                  | 0.1                    |
| shrubs         | 0.5                   | 0.3                    | bio17               | 1.8                  | 1.4                    |
| bio9           | 0.4                   | 0.1                    | ndvi_mean           | 1                    | 0.2                    |
| herbaceous     | 0.2                   | 1.4                    | bio2                | 0.9                  | 0                      |
| ndvi_mean      | 0.1                   | 0                      | bio12               | 0.6                  | 0.9                    |
| hfp            | 0.1                   | 0                      | bio8                | 0.1                  | 0.1                    |
