# Supplementary material for: Current breeding distributions and predicted range shifts under climate change in two subspecies of Black‐tailed Godwits in Asia
Source: PubMed Central journal article supplement — Glob Chang Biol. 2022 Jul 1;28(18):5416–26. doi: 10.1111/gcb.16308 (PMC9544271; doi:10.1111/gcb.16308), 2022-07-01
Supplement: GCB-28-5416-s003.pdf [file GCB-28-5416-s003.pdf]

Table S3. The area changes of suitable breeding habitats in each scenario (Suitability classes, low: 0-0.29, medium: 0.3-0.59 and high: 0.6-1)

| <b>Subspecies</b>   | <b>Suitability</b> | <b>Currently<br/>(Km<sup>2</sup>)</b> | <b>RCP 4.5<br/>(Km<sup>2</sup>)</b> | <b>RCP 8.5<br/>(Km<sup>2</sup>)</b> |
|---------------------|--------------------|---------------------------------------|-------------------------------------|-------------------------------------|
| <i>bohaii</i>       | high               | 90669                                 | -                                   | -                                   |
|                     | medium             | 393433                                | 6742                                | -                                   |
|                     | low                | 844409                                | 141703                              | 121813                              |
|                     | <b>Total</b>       | 1328511                               | 148445                              | 121813                              |
| <i>melanuroides</i> | high               | 351260                                | -                                   | -                                   |
|                     | medium             | 2145200                               | 317888                              | 100845                              |
|                     | low                | 4179490                               | 763732                              | 953325                              |
|                     | <b>Total</b>       | 6675950                               | 1081620                             | 1054170                             |
