# Supplementary material for: Current breeding distributions and predicted range shifts under climate change in two subspecies of Black‐tailed Godwits in Asia
Source: PubMed Central journal article supplement — Glob Chang Biol. 2022 Jul 1;28(18):5416–26. doi: 10.1111/gcb.16308 (PMC9544271; doi:10.1111/gcb.16308), 2022-07-01
Supplement: GCB-28-5416-s004.pdf [file GCB-28-5416-s004.pdf]

Table S1. Environmental variables and Global Climate Models were used in this study. Fourteen variables for predicting the current breeding range were bolded.

---

| <b>Environmental variables</b> |                                                            |
|--------------------------------|------------------------------------------------------------|
| <b>WorldClim_BIO1</b>          | Annual Mean Temperature                                    |
| <b>WorldClim_BIO2</b>          | Mean Diurnal Range (Mean of monthly (max temp - min temp)) |
| WorldClim_BIO3                 | Isothermally (BIO2/BIO7) ( $\times 100$ )                  |
| <b>WorldClim_BIO4</b>          | Temperature Seasonality (standard deviation $\times 100$ ) |
| WorldClim_BIO5                 | Max Temperature of Warmest Month                           |
| WorldClim_BIO6                 | Min Temperature of Coldest Month                           |
| WorldClim_BIO7                 | Temperature Annual Range (BIO5-BIO6)                       |
| <b>WorldClim_BIO8</b>          | Mean Temperature of Wettest Quarter                        |
| <b>WorldClim_BIO9</b>          | Mean Temperature of Driest Quarter                         |
| WorldClim_BIO10                | Mean Temperature of Warmest Quarter                        |
| <b>WorldClim_BIO11</b>         | Mean Temperature of Coldest Quarter                        |
| <b>WorldClim_BIO12</b>         | Annual Precipitation                                       |
| WorldClim_BIO13                | Precipitation of Wettest Month                             |
| WorldClim_BIO14                | Precipitation of Driest Month                              |
| <b>WorldClim_BIO15</b>         | Precipitation Seasonality (Coefficient of Variation)       |
| WorldClim_BIO16                | Precipitation of Wettest Quarter                           |
| <b>WorldClim_BIO17</b>         | Precipitation of Driest Quarter                            |
| WorldClim_BIO18                | Precipitation of Warmest Quarter                           |
| WorldClim_BIO19                | Precipitation of Coldest Quarter                           |
| <b>WorldClim_ELEV</b>          | Elevation                                                  |
| <b>LAND_COVER5</b>             | Shrubs                                                     |
| <b>LAND_COVER6</b>             | Herbaceous Vegetation                                      |
| LAND_COVER8                    | Regularly Flooded Vegetation                               |
| LAND_COVER10                   | Snow/Ice                                                   |
| LAND_COVER11                   | Barren                                                     |

LAND\_COVER12 Open Water

**HFP** Global Human Footprint (1995-2004) v2

HII Global Human Influence Index (1995-2004) v2

**NDVI** May-July, 2014-2018

---

**Global Climate Models and Modelling Centre**

---

GFDL-CM3 NOAA Geophysical Fluid Dynamics Laboratory

MIROC-ESM Japan Agency for Marine-Earth Science and Technology, Atmosphere and Ocean  
Research Institute (The University of Tokyo), and National Institute for Environmental  
Studies

---
