# Supplementary material for: Current breeding distributions and predicted range shifts under climate change in two subspecies of Black‐tailed Godwits in Asia
Source: PubMed Central journal article supplement — Glob Chang Biol. 2022 Jul 1;28(18):5416–26. doi: 10.1111/gcb.16308 (PMC9544271; doi:10.1111/gcb.16308), 2022-07-01
Supplement: GCB-28-5416-s005.pdf [file GCB-28-5416-s005.pdf]

Table S3. The correlation matrix of 14 final variables for predicting the current distribution ranges of the two subspecies of Black-tailed Godwit.

|                   |               |             |            |                   |                  |              |              |              |              |             |             |             |             |             |
|-------------------|---------------|-------------|------------|-------------------|------------------|--------------|--------------|--------------|--------------|-------------|-------------|-------------|-------------|-------------|
| <b>shrubs</b>     | 1             |             |            |                   |                  |              |              |              |              |             |             |             |             |             |
| <b>ndvi</b>       | 0.03          | 1           |            |                   |                  |              |              |              |              |             |             |             |             |             |
| <b>hfp</b>        | -0.27         | 0.39        | 1          |                   |                  |              |              |              |              |             |             |             |             |             |
| <b>Herbaceous</b> | -0.11         | -0.11       | 0.11       | 1                 |                  |              |              |              |              |             |             |             |             |             |
| <b>elevation</b>  | 0.43          | -0.35       | -0.58      | -0.15             | 1                |              |              |              |              |             |             |             |             |             |
| <b>bio17</b>      | 0.17          | -0.17       | -0.25      | -0.02             | 0.31             | 1            |              |              |              |             |             |             |             |             |
| <b>bio15</b>      | 0.37          | -0.36       | -0.55      | -0.06             | 0.73             | -0.23        | 1            |              |              |             |             |             |             |             |
| <b>bio12</b>      | 0.34          | -0.45       | -0.58      | -0.1              | 0.75             | 0.63         | 0.53         | 1            |              |             |             |             |             |             |
| <b>bio11</b>      | -0.2          | -0.12       | 0.15       | -0.06             | 0.18             | 0.49         | -0.29        | 0.34         | 1            |             |             |             |             |             |
| <b>bio9</b>       | 0.11          | 0.52        | 0.54       | -0.01             | -0.42            | -0.01        | -0.5         | -0.41        | 0.26         | 1           |             |             |             |             |
| <b>bio8</b>       | -0.67         | -0.21       | 0.36       | 0.16              | -0.59            | -0.19        | -0.45        | -0.39        | 0.24         | -0.15       | 1           |             |             |             |
| <b>bio4</b>       | -0.15         | 0.24        | 0.28       | 0.15              | -0.76            | -0.52        | -0.29        | -0.76        | -0.75        | 0.07        | 0.28        | 1           |             |             |
| <b>bio2</b>       | 0.19          | 0.01        | -0.01      | -0.07             | 0.46             | -0.26        | 0.52         | 0.19         | -0.27        | -0.2        | -0.37       | -0.16       | 1           |             |
| <b>bio1</b>       | -0.55         | -0.02       | 0.5        | 0.07              | -0.46            | 0.14         | -0.65        | -0.22        | 0.74         | 0.31        | 0.77        | -0.14       | -0.45       | 1           |
|                   | <b>shrubs</b> | <b>ndvi</b> | <b>hfp</b> | <b>Herbaceous</b> | <b>elevation</b> | <b>bio17</b> | <b>bio15</b> | <b>bio12</b> | <b>bio11</b> | <b>bio9</b> | <b>bio8</b> | <b>bio4</b> | <b>bio2</b> | <b>bio1</b> |
